# Supplementary material for: The Constrained Maximal Expression Level Owing to Haploidy Shapes Gene Content on the Mammalian X Chromosome
Source: PLoS Biol. 2015 Dec 18;13(12):e1002315. doi: 10.1371/journal.pbio.1002315 (PMC4686125; doi:10.1371/journal.pbio.1002315)
Supplement: S6 Table — (XLSX) [file pbio.1002315.s016.xlsx]

## Sheet: S6 Table
S6 Table.
sample fold_enrichment_on_X p-value(fdr-corrected)
tpm.prostate.20cancer.20cell.20line.3aDU145.CNhs11260.10490.107B4.hg19	0.06651	0.00019
tpm.mesothelioma.20cell.20line.3aMero.82.CNhs13069.10853.111F7.hg19	0.13344	0.00092
tpm.xeroderma.20pigentosum.20b.20cell.20line.3aXPL.2017.CNhs11813.10563.108A5.hg19	0.13388	0.00092
tpm.renal.20cell.20carcinoma.20cell.20line.3aTUHR10TKB.CNhs11257.10471.106I3.hg19	0.13431	0.00092
tpm.gastrointestinal.20carcinoma.20cell.20line.3aECC12.CNhs11738.10615.108G3.hg19	0.13519	0.00125
tpm.anaplastic.20large.20cell.20lymphoma.20cell.20line.3aKi.JK.CNhs11881.10795.110I3.hg19	0.20081	0.00359
tpm.embryonic.20pancreas.20cell.20line.3a1B2C6.CNhs11731.10604.108F1.hg19	0.20081	0.00359
tpm.oral.20squamous.20cell.20carcinoma.20cell.20line.3aSAS.CNhs11810.10544.107H4.hg19	0.20081	0.00359
tpm.oral.20squamous.20cell.20carcinoma.20cell.20line.3aHO.1.u.1.CNhs11287.10550.107I1.hg19	0.20413	0.00495
tpm.acute.20myeloid.20leukemia.20.28FAB.20M4.29.20cell.20line.3aFKH.1.CNhs13503.10830.111D2.hg19	0.26862	0.01267
tpm.bronchial.20squamous.20cell.20carcinoma.20cell.20line.3aKNS.62.CNhs11862.10760.110E4.hg19	0.26862	0.01267
tpm.cord.20blood.20derived.20cell.20line.3aCOBL.a.2024h.20infection.CNhs11050.10453.106G3.hg19	0.26862	0.01267
tpm.tubular.20adenocarcinoma.20cell.20line.3aSUIT.2.CNhs11883.10797.110I5.hg19	0.26862	0.01267
tpm.Burkitt.27s.20lymphoma.20cell.20line.3aRAJI.CNhs11268.10476.106I8.hg19	0.2695	0.01267
tpm.acute.20lymphoblastic.20leukemia.20.28B.ALL.29.20cell.20line.3aNALM.6.CNhs11282.10534.107G3.hg19	0.27489	0.0165
tpm.acute.20myeloid.20leukemia.20.28FAB.20M1.29.20cell.20line.3aHYT.1.CNhs13054.10828.111C9.hg19	0.33688	0.03449
tpm.acute.20myeloid.20leukemia.20.28FAB.20M2.29.20cell.20line.3aKasumi.6.CNhs13052.10792.110H9.hg19	0.33688	0.03449
tpm.acute.20myeloid.20leukemia.20.28FAB.20M4eo.29.20cell.20line.3aEoL.3.CNhs13057.10833.111D5.hg19	0.33909	0.03449
tpm.bile.20duct.20carcinoma.20cell.20line.3aTFK.1.CNhs11265.10496.107C1.hg19	0.33909	0.03449
tpm.signet.20ring.20carcinoma.20cell.20line.3aNUGC.4.CNhs11270.10483.107A6.hg19	0.33909	0.03449
tpm.embryonic.20pancreas.20cell.20line.3a1C3IKEI.CNhs11733.10606.108F3.hg19	0.40558	0.06228
tpm.epidermoid.20carcinoma.20.20cell.20line.3aA431.CNhs10743.10426.106D3.hg19	0.40558	0.06228
tpm.mycosis.20fungoides.2c.20T.20cell.20lymphoma.20cell.20line.3aHuT.20102.20TIB.162.CNhs11858.10744.110C6.hg19	0.40558	0.06228
tpm.oral.20squamous.20cell.20carcinoma.20cell.20line.3aHSC.3.CNhs11717.10545.107H5.hg19	0.40558	0.06228
tpm.sacrococcigeal.20teratoma.20cell.20line.3aHTST.CNhs11829.10695.109G2.hg19	0.40558	0.06228
tpm.bile.20duct.20carcinoma.20cell.20line.3aHuCCT1.CNhs10750.10432.106D9.hg19	0.40691	0.06228
tpm.chronic.20myelogenous.20leukemia.20.28CML.29.20cell.20line.3aMEG.A2.CNhs11865.10766.110F1.hg19	0.40691	0.06228
tpm.malignant.20trichilemmal.20cyst.20cell.20line.3aDJM.1.CNhs10730.10412.106B7.hg19	0.40691	0.06228
tpm.acute.20myeloid.20leukemia.20.28FAB.20M4eo.29.20cell.20line.3aEoL.1.CNhs13056.10832.111D4.hg19	0.47473	0.13233
tpm.breast.20carcinoma.20cell.20line.3aMCF7.CNhs11943.10482.107A5.hg19	0.47473	0.13233
tpm.cord.20blood.20derived.20cell.20line.3aCOBL.a.20untreated.CNhs11045.10449.106F8.hg19	0.47473	0.13233
tpm.ductal.20cell.20carcinoma.20cell.20line.3aMIA.20Paca2.CNhs11259.10488.107B2.hg19	0.47473	0.13233
tpm.embryonic.20pancreas.20cell.20line.3a1C3D3.CNhs11732.10605.108F2.hg19	0.47473	0.13233
tpm.embryonic.20pancreas.20cell.20line.3a2C6.CNhs11814.10603.108E9.hg19	0.47473	0.13233
tpm.hairy.20cell.20leukemia.20cell.20line.3aMo.CNhs11843.10712.109I1.hg19	0.47473	0.13233
tpm.normal.20intestinal.20epithelial.20cell.20line.3aFHs.2074.20Int.CNhs11950.10812.111B2.hg19	0.47473	0.13233
tpm.serous.20cystadenocarcinoma.20cell.20line.3aHTOA.CNhs11827.10693.109F9.hg19	0.47473	0.13233
tpm.Hodgkin.27s.20lymphoma.20cell.20line.3aHD.Mar2.CNhs11715.10435.106E3.hg19	0.4763	0.13233
tpm.mesothelioma.20cell.20line.3aMero.95.CNhs13073.10856.111G1.hg19	0.47787	0.13233
tpm.bronchogenic.20carcinoma.20cell.20line.3aChaGo.K.1.CNhs11841.10710.109H8.hg19	0.47946	0.13233
tpm.hepatoblastoma.20cell.20line.3aHuH.6.CNhs11742.10633.108I3.hg19	0.47946	0.13233
tpm.chronic.20myeloblastic.20leukemia.20.28CML.29.20cell.20line.3aKCL.22.CNhs11886.10801.110I9.hg19	0.54434	0.19709
tpm.neurofibroma.20cell.20line.3aHs.2053.2eT.CNhs11854.10729.110A9.hg19	0.54434	0.19709
tpm.signet.20ring.20carcinoma.20cell.20line.3aKato.20III.CNhs10753.10436.106E4.hg19	0.54434	0.19709
tpm.cord.20blood.20derived.20cell.20line.3aCOBL.a.2024h.20infection.28.C.29.CNhs11049.10452.106G2.hg19	0.54614	0.19709
tpm.mesothelioma.20cell.20line.3aNCI.H2452.CNhs13064.10848.111F2.hg19	0.54614	0.19709
tpm.acute.20myeloid.20leukemia.20.28FAB.20M0.29.20cell.20line.3aKG.1.CNhs13053.10827.111C8.hg19	0.54796	0.19709
tpm.mesothelioma.20cell.20line.3aACC.MESO.4.CNhs11264.10494.107B8.hg19	0.54978	0.19709
tpm.acute.20myeloid.20leukemia.20.28FAB.20M5.29.20cell.20line.3aU.937.20DE.4.CNhs13058.10834.111D6.hg19	0.55162	0.19709
tpm.merkel.20cell.20carcinoma.20cell.20line.3aMKL.1.CNhs12838.10843.111E6.hg19	0.55347	0.19709
tpm.spindle.20cell.20sarcoma.20cell.20line.3aHs.20132.2eT.CNhs11857.10737.110B8.hg19	0.55347	0.19709
tpm.acute.20lymphoblastic.20leukemia.20.28B.ALL.29.20cell.20line.3aBALL.1.CNhs11251.10455.106G5.hg19	0.61441	0.29226
tpm.epithelioid.20sarcoma.20cell.20line.3aHS.ES.1.CNhs11247.10443.106F2.hg19	0.61441	0.29226
tpm.giant.20cell.20carcinoma.20cell.20line.3aLu99B.CNhs10751.10433.106E1.hg19	0.61441	0.29226
tpm.keratoacanthoma.20cell.20line.3aHKA.1.CNhs11880.10791.110H8.hg19	0.61441	0.29226
tpm.osteosarcoma.20cell.20line.3aHS.Os.1.CNhs11290.10558.107I9.hg19	0.61441	0.29226
tpm.papillotubular.20adenocarcinoma.20cell.20line.3aTGBC18TKB.CNhs10734.10417.106C3.hg19	0.61441	0.29226
tpm.small.20cell.20gastrointestinal.20carcinoma.20cell.20line.3aECC10.CNhs11736.10610.108F7.hg19	0.61441	0.29226
tpm.acute.20myeloid.20leukemia.20.28FAB.20M5.29.20cell.20line.3aTHP.1.20.28fresh.29.CNhs10722.10399.106A3.hg19	0.61645	0.29226
tpm.anaplastic.20carcinoma.20cell.20line.3a8305C.CNhs10745.10428.106D5.hg19	0.68495	0.40772
tpm.biphenotypic.20B.20myelomonocytic.20leukemia.20cell.20line.3aMV.4.11.CNhs11845.10718.109I7.hg19	0.68495	0.40772
tpm.carcinoid.20cell.20line.3aNCI.H1770.CNhs11834.10703.109H1.hg19	0.68495	0.40772
tpm.chronic.20myelogenous.20leukemia.20cell.20line.3aKU812.CNhs10727.10409.106B4.hg19	0.68495	0.40772
tpm.glassy.20cell.20carcinoma.20cell.20line.3aHOKUG.CNhs11824.10688.109F4.hg19	0.68495	0.40772
tpm.leiomyoblastoma.20.20cell.20line.3aG.402.CNhs11848.10721.110A1.hg19	0.68495	0.40772
tpm.mesenchymal.20stem.20cell.20line.3aHu5.2fE18.CNhs11718.10568.108B1.hg19	0.68495	0.40772
tpm.mesothelioma.20cell.20line.3aMero.84.CNhs13072.10855.111F9.hg19	0.68495	0.40772
tpm.mesothelioma.20cell.20line.3aNCI.H28.CNhs13061.10845.111E8.hg19	0.68495	0.40772
tpm.non.20T.20non.20B.20acute.20lymphoblastic.20leukemia.20.28ALL.29.20cell.20line.3aP30.2fOHK.CNhs10747.10430.106D7.hg19	0.68495	0.40772
tpm.rhabdomyosarcoma.20cell.20line.3aKYM.1.CNhs11877.10787.110H4.hg19	0.68495	0.40772
tpm.b.20cell.20line.3aRPMI1788.CNhs10744.10427.106D4.hg19	0.68723	0.40772
tpm.glioblastoma.20cell.20line.3aA172.2c.20tech_rep1.CNhs11185.10444.106F3.hg19	0.68723	0.40772
tpm.squamous.20cell.20carcinoma.20cell.20line.3aEC.GI.10.CNhs11252.10463.106H4.hg19	0.68723	0.40772
tpm.epidermoid.20carcinoma.20cell.20line.3aCa.20Ski.CNhs10748.10431.106D8.hg19	0.68953	0.46827
tpm.mesothelioma.20cell.20line.3aMero.41.CNhs13067.10851.111F5.hg19	0.68953	0.46827
tpm.transitional.cell.20carcinoma.20cell.20line.3a5637.CNhs10735.10418.106C4.hg19	0.69184	0.46827
tpm.oral.20squamous.20cell.20carcinoma.20cell.20line.3aCa9.22.CNhs10752.10434.106E2.hg19	0.69417	0.46827
tpm.Ewing.27s.20sarcoma.20cell.20line.3aHs.20863.2eT.CNhs11836.10705.109H3.hg19	0.75595	0.54475
tpm.acute.20myeloid.20leukemia.20.28FAB.20M5.29.20cell.20line.3aTHP.1.20.28revived.29.CNhs10723.10400.106A4.hg19	0.75595	0.54475
tpm.argyrophil.20small.20cell.20carcinoma.20cell.20line.3aTC.YIK.CNhs11725.10589.108D4.hg19	0.75595	0.54475
tpm.chronic.20lymphocytic.20leukemia.20.28T.CLL.29.20cell.20line.3aSKW.3.CNhs11714.10416.106C2.hg19	0.75595	0.54475
tpm.mesothelioma.20cell.20line.3aACC.MESO.1.CNhs11263.10493.107B7.hg19	0.75595	0.54475
tpm.mesothelioma.20cell.20line.3aMero.14.2c.20tech_rep1.CNhs13065.10849.111F3.hg19	0.75595	0.54475
tpm.retinoblastoma.20cell.20line.3aY79.CNhs11267.10475.106I7.hg19	0.75595	0.54475
tpm.hepatoma.20cell.20line.3aLi.7.CNhs11271.10484.107A7.hg19	0.75848	0.61974
tpm.mesothelioma.20cell.20line.3aNCI.H226.CNhs13062.10846.111E9.hg19	0.75848	0.61974
tpm.osteoclastoma.20cell.20line.3aHs.20706.2eT.CNhs11835.10704.109H2.hg19	0.75848	0.61974
tpm.small.cell.20gastrointestinal.20carcinoma.20cell.20line.3aECC4.CNhs11734.10609.108F6.hg19	0.76359	0.61974
tpm.embryonic.20kidney.20cell.20line.3a.20HEK293.2fSLAM.20infection.2c.2024hr.CNhs11047.10451.106G1.hg19	0.82743	0.77143
tpm.gastric.20adenocarcinoma.20cell.20line.3aMKN45.CNhs11819.10612.108F9.hg19	0.82743	0.77143
tpm.mesothelioma.20cell.20line.3aMero.83.CNhs13070.10854.111F8.hg19	0.82743	0.77143
tpm.mucinous.20adenocarcinoma.20cell.20line.3aJHOM.1.CNhs11752.10648.109A9.hg19	0.82743	0.77143
tpm.pharyngeal.20carcinoma.20cell.20line.3aDetroit.20562.CNhs11849.10723.110A3.hg19	0.82743	0.77143
tpm.small.20cell.20lung.20carcinoma.20cell.20line.3aWA.hT.CNhs11812.10562.108A4.hg19	0.82743	0.77143
tpm.anaplastic.20squamous.20cell.20carcinoma.20cell.20line.3aRPMI.202650.CNhs11889.10805.111A4.hg19	0.83021	0.77143
tpm.cervical.20cancer.20cell.20line.3aME.180.CNhs11289.10553.107I4.hg19	0.83021	0.77143
tpm.clear.20cell.20carcinoma.20cell.20line.3aTEN.CNhs11930.10636.108I6.hg19	0.83021	0.77143
tpm.adenocarcinoma.20cell.20line.3aIM95m.CNhs11882.10796.110I4.hg19	0.83301	0.77143
tpm.glioblastoma.20cell.20line.3aA172.2c.20tech_rep2.CNhs11248.10444.106F3.hg19	0.83865	0.77143
tpm.mesothelioma.20cell.20line.3aNo36.CNhs13074.10857.111G2.hg19	0.84151	0.77143
tpm.mesothelioma.20cell.20line.3aMero.25.CNhs13066.10850.111F4.hg19	0.85311	0.77143
tpm.Krukenberg.20tumor.20cell.20line.3aHSKTC.CNhs11822.10687.109F3.hg19	0.89939	0.92354
tpm.acute.20myeloid.20leukemia.20.28FAB.20M2.29.20cell.20line.3aNKM.1.CNhs11864.10765.110E9.hg19	0.89939	0.92354
tpm.liposarcoma.20cell.20line.3aKMLS.1.CNhs11870.10782.110G8.hg19	0.89939	0.92354
tpm.neuroblastoma.20cell.20line.3aNB.1.CNhs11284.10539.107G8.hg19	0.89939	0.92354
tpm.acute.20myeloid.20leukemia.20.28FAB.20M5.29.20cell.20line.3aTHP.1.20.28thawed.29.CNhs10724.10405.106A9.hg19	0.90242	0.92354
tpm.endometrial.20carcinoma.20cell.20line.3aOMC.2.CNhs11266.10497.107C2.hg19	0.90547	0.92354
tpm.somatostatinoma.20cell.20line.3aQGP.1.CNhs11869.10781.110G7.hg19	0.90547	0.92354
tpm.glioma.20cell.20line.3aGI.1.CNhs10731.10413.106B8.hg19	0.90854	0.92354
tpm.renal.20cell.20carcinoma.20cell.20line.3aOS.RC.2.CNhs10729.10411.106B6.hg19	0.90854	0.92354
tpm.Wilms.27.20tumor.20cell.20line.3aG.401.CNhs11892.10809.111A8.hg19	0.91163	0.92354
tpm.breast.20carcinoma.20cell.20line.3aMDA.MB.453.CNhs10736.10419.106C5.hg19	0.97184	1
tpm.carcinoid.20cell.20line.3aSK.PN.DW.CNhs11846.10719.109I8.hg19	0.97184	1
tpm.large.20cell.20non.keratinizing.20squamous.20carcinoma.20cell.20line.3aSKG.II.SF.CNhs11825.10692.109F8.hg19	0.97184	1
tpm.splenic.20lymphoma.20with.20villous.20lymphocytes.20cell.20line.3aSLVL.CNhs10741.10424.106D1.hg19	0.97184	1
tpm.basal.20cell.20carcinoma.20cell.20line.3aTE.20354.2eT.CNhs11932.10702.109G9.hg19	0.97512	1
tpm.lung.20adenocarcinoma.20cell.20line.3aA549.CNhs11275.10499.107C4.hg19	0.97512	1
tpm.rectal.20cancer.20cell.20line.3aTT1TKB.CNhs11255.10469.106I1.hg19	0.97512	1
tpm.tridermal.20teratoma.20cell.20line.3aHGRT.CNhs11828.10694.109G1.hg19	0.97843	1
tpm.plasma.20cell.20leukemia.20cell.20line.3aARH.77.CNhs12807.10840.111E3.hg19	0.98176	1
tpm.NK.20T.20cell.20leukemia.20cell.20line.3aKHYG.1.CNhs11867.10777.110G3.hg19	1.04477	0.84886
tpm.giant.20cell.20carcinoma.20cell.20line.3aLU65.CNhs11274.10487.107B1.hg19	1.04477	0.84886
tpm.large.20cell.20lung.20carcinoma.20cell.20line.3aIA.LM.CNhs11277.10509.107D5.hg19	1.04477	0.84886
tpm.lymphoma.2c.20malignant.2c.20hairy.20B.cell.20cell.20line.3aMLMA.CNhs11935.10775.110G1.hg19	1.04477	0.84886
tpm.medulloblastoma.20cell.20line.3aONS.76.CNhs11861.10759.110E3.hg19	1.04477	0.84886
tpm.myeloma.20cell.20line.3aPCM6.CNhs11258.10474.106I6.hg19	1.04477	0.84886
tpm.rhabdomyosarcoma.20cell.20line.3aRMS.YM.CNhs11269.10477.106I9.hg19	1.04477	0.84886
tpm.acute.20lymphoblastic.20leukemia.20.28T.ALL.29.20cell.20line.3aHPB.ALL.CNhs10746.10429.106D6.hg19	1.04832	0.84886
tpm.acute.20myeloid.20leukemia.20.28FAB.20M7.29.20cell.20line.3aMKPL.1.CNhs11888.10802.111A1.hg19	1.04832	0.84886
tpm.leukemia.2c.20chronic.20megakaryoblastic.20.20cell.20line.3aMEG.01.CNhs11859.10752.110D5.hg19	1.04832	0.84886
tpm.transitional.20cell.20carcinoma.20cell.20line.3aHs.20769.2eT.CNhs11837.10707.109H5.hg19	1.05909	0.84886
tpm.hereditary.20spherocytic.20anemia.20cell.20line.3aWIL2.NS.CNhs11891.10808.111A7.hg19	1.1182	0.70595
tpm.leiomyoma.20cell.20line.3a15242A.CNhs11723.10570.108B3.hg19	1.1182	0.70595
tpm.papillary.20adenocarcinoma.20cell.20line.3a8505C.CNhs11716.10437.106E5.hg19	1.1182	0.70595
tpm.serous.20adenocarcinoma.20cell.20line.3aSK.OV.3.R.20after.20co.culture.20with.20SOC.57.02.G.2c.20biol_rep1.CNhs13508.11843.124H7.hg19	1.1182	0.70595
tpm.small.20cell.20lung.20carcinoma.20cell.20line.3aLK.2.CNhs11285.10541.107H1.hg19	1.1182	0.70595
tpm.hepatic.20mesenchymal.20tumor.20cell.20line.3aLI90.CNhs11868.10778.110G4.hg19	1.12201	0.70595
tpm.squamous.20cell.20lung.20carcinoma.20cell.20line.3aEBC.1.CNhs11273.10486.107A9.hg19	1.12201	0.70595
tpm.testicular.20germ.20cell.20embryonal.20carcinoma.20cell.20line.3aNEC14.CNhs12351.10591.108D6.hg19	1.12201	0.70595
tpm.choriocarcinoma.20cell.20line.3aBeWo.CNhs10740.10423.106C9.hg19	1.12969	0.70595
tpm.acute.20myeloid.20leukemia.20.28FAB.20M3.29.20cell.20line.3aHL60.CNhs13055.10829.111D1.hg19	1.19213	0.61974
tpm.acute.20myeloid.20leukemia.20.28FAB.20M5.29.20cell.20line.3aP31.2fFUJ.CNhs13051.10770.110F5.hg19	1.19213	0.61974
tpm.myelodysplastic.20syndrome.20cell.20line.3aSKM.1.CNhs11934.10772.110F7.hg19	1.19213	0.61974
tpm.serous.20adenocarcinoma.20cell.20line.3aSK.OV.3.R.2c.20biol_rep1.CNhs13099.11841.124H5.hg19	1.19213	0.61974
tpm.transitional.cell.20carcinoma.20cell.20line.3aJMSU1.CNhs11261.10492.107B6.hg19	1.19213	0.61974
tpm.leiomyoma.20cell.20line.3a10964C.CNhs11722.10569.108B2.hg19	1.2003	0.54475
tpm.B.20lymphoblastoid.20cell.20line.3a.20GM12878.20ENCODE.2c.20biol_rep3.CNhs12333.10823.111C4.hg19	1.20442	0.54475
tpm.medulloblastoma.20cell.20line.3aD283.20Med.CNhs12805.10838.111E1.hg19	1.21276	0.54475
tpm.Burkitt.27s.20lymphoma.20cell.20line.3aDAUDI.CNhs10739.10422.106C8.hg19	1.26657	0.46827
tpm.gall.20bladder.20carcinoma.20cell.20line.3aTGBC14TKB.CNhs11256.10470.106I2.hg19	1.26657	0.46827
tpm.small.20cell.20lung.20carcinoma.20cell.20line.3aNCI.H82.CNhs12809.10842.111E5.hg19	1.26657	0.46827
tpm.squamous.20cell.20carcinoma.20cell.20line.3aJHUS.nk1.CNhs11749.10646.109A7.hg19	1.26657	0.46827
tpm.acute.20myeloid.20leukemia.20.28FAB.20M6.29.20cell.20line.3aF.36E.CNhs13060.10836.111D8.hg19	1.2709	0.46827
tpm.mixed.20mullerian.20tumor.20cell.20line.3aHTMMT.CNhs11944.10689.109F5.hg19	1.2709	0.46827
tpm.myxofibrosarcoma.20cell.20line.3aNMFH.1.CNhs11821.10684.109E9.hg19	1.27527	0.46827
tpm.neuroblastoma.20cell.20line.3aNH.12.CNhs11811.10555.107I6.hg19	1.27527	0.46827
tpm.B.20lymphoblastoid.20cell.20line.3a.20GM12878.20ENCODE.2c.20biol_rep2.CNhs12332.10822.111C3.hg19	1.34151	0.35195
tpm.colon.20carcinoma.20cell.20line.3aCACO.2.CNhs11280.10513.107D9.hg19	1.34151	0.35195
tpm.diffuse.20large.20B.cell.20lymphoma.20cell.20line.3aCTB.1.CNhs11741.10631.108I1.hg19	1.34151	0.35195
tpm.lung.20adenocarcinoma.20cell.20line.3aPC.14.CNhs10726.10408.106B3.hg19	1.34151	0.35195
tpm.Hep.2.20cells.20treated.20with.20Streptococci.20strain.20JRS4.2c.20biol_rep1.CNhs13478.11894.125E4.hg19	1.34612	0.35195
tpm.testicular.20germ.20cell.20embryonal.20carcinoma.20cell.20line.3aITO.II.CNhs11876.10786.110H3.hg19	1.34612	0.35195
tpm.leiomyoma.20cell.20line.3a15425.CNhs11724.10571.108B4.hg19	1.35076	0.35195
tpm.mesothelioma.20cell.20line.3aMero.48a.CNhs13068.10852.111F6.hg19	1.35544	0.35195
tpm.adult.20T.cell.20leukemia.20cell.20line.3aATN.1.CNhs10738.10421.106C7.hg19	1.36014	0.35195
tpm.acute.20lymphoblastic.20leukemia.20.28T.ALL.29.20cell.20line.3aJurkat.CNhs11253.10464.106H5.hg19	1.37446	0.29226
tpm.acantholytic.20squamous.20carcinoma.20cell.20line.3aHCC1806.CNhs11844.10717.109I6.hg19	1.41697	0.24229
tpm.acute.20myeloid.20leukemia.20.28FAB.20M6.29.20cell.20line.3aF.36P.CNhs13505.10837.111D9.hg19	1.41697	0.24229
tpm.merkel.20cell.20carcinoma.20cell.20line.3aMS.1.CNhs12839.10844.111E7.hg19	1.41697	0.24229
tpm.neuroepithelioma.20cell.20line.3aSK.N.MC.CNhs11853.10728.110A8.hg19	1.41697	0.24229
tpm.pleomorphic.20hepatocellular.20carcinoma.20cell.20line.3aSNU.387.CNhs11933.10706.109H4.hg19	1.41697	0.24229
tpm.testicular.20germ.20cell.20embryonal.20carcinoma.20cell.20line.3aNEC8.CNhs11726.10590.108D5.hg19	1.41697	0.24229
tpm.thyroid.20carcinoma.20cell.20line.3aKHM.5M.CNhs14140.10776.110G2.hg19	1.41697	0.24229
tpm.Hep.2.20cells.20mock.20treated.2c.20biol_rep3.CNhs13501.11900.125F1.hg19	1.42185	0.24229
tpm.Hep.2.20cells.20treated.20with.20Streptococci.20strain.205448.2c.20biol_rep2.CNhs13496.11891.125E1.hg19	1.42185	0.24229
tpm.hepatocellular.20carcinoma.20cell.20line.3a.20HepG2.20ENCODE.2c.20biol_rep1.CNhs12328.10818.111B8.hg19	1.42185	0.24229
tpm.acute.20myeloid.20leukemia.20.28FAB.20M2.29.20cell.20line.3aKasumi.1.CNhs13502.10788.110H5.hg19	1.42677	0.24229
tpm.glioblastoma.20cell.20line.3aT98G.CNhs11272.10485.107A8.hg19	1.44015	0.23946
tpm.Hep.2.20cells.20mock.20treated.2c.20biol_rep1.CNhs13479.11898.125E8.hg19	1.49295	0.16588
tpm.acute.20myeloid.20leukemia.20.28FAB.20M4.29.20cell.20line.3aHNT.34.CNhs13504.10831.111D3.hg19	1.49295	0.16588
tpm.maxillary.20sinus.20tumor.20cell.20line.3aHSQ.89.CNhs10732.10414.106B9.hg19	1.49295	0.16588
tpm.serous.20adenocarcinoma.20cell.20line.3aJHOS.2.CNhs11746.10639.108I9.hg19	1.49295	0.16588
tpm.squamous.20cell.20carcinoma.20cell.20line.3aT3M.5.CNhs11739.10616.108G4.hg19	1.49295	0.16588
tpm.B.20lymphoblastoid.20cell.20line.3a.20GM12878.20ENCODE.2c.20biol_rep1.CNhs12331.10821.111C2.hg19	1.49811	0.16588
tpm.Wilms.27.20tumor.20cell.20line.3aHFWT.CNhs11728.10597.108E3.hg19	1.49811	0.16588
tpm.endometrioid.20adenocarcinoma.20cell.20line.3aJHUEM.1.CNhs11748.10643.109A4.hg19	1.49811	0.16588
tpm.hepatocellular.20carcinoma.20cell.20line.3a.20HepG2.20ENCODE.2c.20biol_rep2.CNhs12329.10819.111B9.hg19	1.49811	0.16588
tpm.hepatocellular.20carcinoma.20cell.20line.3a.20HepG2.20ENCODE.2c.20biol_rep3.CNhs12330.10820.111C1.hg19	1.49811	0.16588
tpm.neuroblastoma.20cell.20line.3aCHP.134.CNhs11276.10508.107D4.hg19	1.49811	0.16588
tpm.schwannoma.20cell.20line.3aHS.PSS.2c.20tech_rep1.CNhs11183.10442.106F1.hg19	1.50331	0.16588
tpm.bone.20marrow.20stromal.20cell.20line.3aStromaNKtert.CNhs11931.10686.109F2.hg19	1.51383	0.16588
tpm.meningioma.20cell.20line.3aHKBMM.CNhs11945.10691.109F7.hg19	1.56945	0.13233
tpm.mucinous.20cystadenocarcinoma.20.20cell.20line.3aMCAS.CNhs11873.10784.110H1.hg19	1.56945	0.13233
tpm.schwannoma.20cell.20line.3aHS.PSS.2c.20tech_rep2.CNhs11245.10442.106F1.hg19	1.56945	0.13233
tpm.Hep.2.20cells.20treated.20with.20Streptococci.20strain.205448.2c.20biol_rep1.CNhs13477.11890.125D9.hg19	1.5749	0.13233
tpm.bronchioalveolar.20carcinoma.20cell.20line.3aNCI.H358.CNhs11840.10709.109H7.hg19	1.5749	0.13233
tpm.mesothelioma.20cell.20line.3aONE58.CNhs13075.10858.111G3.hg19	1.58039	0.13233
tpm.neuroblastoma.20cell.20line.3aNBsusSR.CNhs11818.10607.108F4.hg19	1.58591	0.13233
tpm.large.20cell.20lung.20carcinoma.20cell.20line.3aNCI.H460.CNhs12806.10839.111E2.hg19	1.60273	0.11427
tpm.Hep.2.20cells.20treated.20with.20Streptococci.20strain.20JRS4.2c.20biol_rep2.CNhs13498.11895.125E5.hg19	1.64649	0.08502
tpm.gastric.20adenocarcinoma.20cell.20line.3aMKN1.CNhs11737.10614.108G2.hg19	1.64649	0.08502
tpm.liposarcoma.20cell.20line.3aSW.20872.CNhs11851.10726.110A6.hg19	1.64649	0.08502
tpm.prostate.20cancer.20cell.20line.3aPC.3.CNhs11243.10439.106E7.hg19	1.64649	0.08502
tpm.acute.20myeloid.20leukemia.20.28FAB.20M5.29.20cell.20line.3aNOMO.1.CNhs13050.10764.110E8.hg19	1.66382	0.08502
tpm.gastric.20cancer.20cell.20line.3aAZ521.CNhs11286.10549.107H9.hg19	1.66968	0.08502
tpm.granulosa.20cell.20tumor.20cell.20line.3aKGN.CNhs11740.10624.108H3.hg19	1.72406	0.05019
tpm.Hep.2.20cells.20treated.20with.20Streptococci.20strain.20JRS4.2c.20biol_rep3.CNhs13499.11896.125E6.hg19	1.73009	0.04985
tpm.lens.20epithelial.20cell.20line.3aSRA.2001.2f04.CNhs11750.10647.109A8.hg19	1.73009	0.04985
tpm.choriocarcinoma.20cell.20line.3aSCH.CNhs11875.10785.110H2.hg19	1.73616	0.04985
tpm.neuroectodermal.20tumor.20cell.20line.3aFU.RPNT.2.CNhs11753.10663.109C6.hg19	1.73616	0.04985
tpm.chronic.20myelogenous.20leukemia.20cell.20line.3aK562.CNhs11250.10454.106G4.hg19	1.80218	0.03449
tpm.teratocarcinoma.20cell.20line.3aNCR.G1.CNhs11884.10798.110I6.hg19	1.80218	0.03449
tpm.normal.20embryonic.20palatal.20mesenchymal.20cell.20line.3aHEPM.CNhs11894.10813.111B3.hg19	1.8085	0.03449
tpm.osteosarcoma.20cell.20line.3a143B.2fTK.5e.28..29neo.5e.28R.29.CNhs11279.10510.107D6.hg19	1.81487	0.03449
tpm.ductal.20cell.20carcinoma.20cell.20line.3aKLM.1.CNhs11100.10438.106E6.hg19	1.82128	0.03449
tpm.neuroectodermal.20tumor.20cell.20line.3aFU.RPNT.1.CNhs11744.10637.108I7.hg19	1.82128	0.03449
tpm.Hep.2.20cells.20mock.20treated.2c.20biol_rep2.CNhs13500.11899.125E9.hg19	1.88084	0.01808
tpm.mesothelioma.20cell.20line.3aNCI.H2052.CNhs13063.10847.111F1.hg19	1.88084	0.01808
tpm.small.20cell.20cervical.20cancer.20cell.20line.3aHCSC.1.CNhs11885.10800.110I8.hg19	1.88084	0.01808
tpm.acute.20myeloid.20leukemia.20.28FAB.20M7.29.20cell.20line.3aM.MOK.CNhs13049.10699.109G6.hg19	1.88746	0.01808
tpm.cervical.20cancer.20cell.20line.3aD98.AH2.CNhs11288.10552.107I3.hg19	1.88746	0.01808
tpm.teratocarcinoma.20cell.20line.3aPA.1.CNhs11890.10807.111A6.hg19	1.90761	0.01808
tpm.Hep.2.20cells.20treated.20with.20Streptococci.20strain.205448.2c.20biol_rep3.CNhs13497.11892.125E2.hg19	1.96006	0.01267
tpm.adrenal.20cortex.20adenocarcinoma.20cell.20line.3aSW.13.CNhs11893.10810.111A9.hg19	1.96006	0.01267
tpm.carcinosarcoma.20cell.20line.3aJHUCS.1.CNhs11747.10642.109A3.hg19	1.96006	0.01267
tpm.alveolar.20cell.20carcinoma.20cell.20line.3aSW.201573.CNhs11838.10708.109H6.hg19	2.03983	0.00582
tpm.pancreatic.20carcinoma.20cell.20line.3aNOR.P1.CNhs11832.10698.109G5.hg19	2.08402	0.00515
tpm.lymphangiectasia.20cell.20line.3aDS.1.CNhs11852.10727.110A7.hg19	2.12018	0.00369
tpm.pagetoid.20sarcoma.20cell.20line.3aHs.20925.2eT.CNhs11856.10732.110B3.hg19	2.12233	0.00348
tpm.fibrosarcoma.20cell.20line.3aHT.1080.CNhs11860.10758.110E2.hg19	2.12772	0.0027
tpm.myxofibrosarcoma.20cell.20line.3aMFH.ino.CNhs11729.10600.108E6.hg19	2.12772	0.0027
tpm.synovial.20sarcoma.20cell.20line.3aHS.SY.II.CNhs11244.10441.106E9.hg19	2.12772	0.0027
tpm.thymic.20carcinoma.20cell.20line.3aTy.82.CNhs14139.10803.111A2.hg19	2.20109	0.00156
tpm.astrocytoma.20cell.20line.3aTM.31.CNhs10742.10425.106D2.hg19	2.28258	0.00092
tpm.melanoma.20cell.20line.3aCOLO.20679.CNhs11281.10514.107E1.hg19	2.28258	0.00092
tpm.peripheral.20neuroectodermal.20tumor.20cell.20line.3aKU.SN.CNhs11830.10697.109G4.hg19	2.28258	0.00092
tpm.epitheloid.20carcinoma.20cell.20line.3a.20HelaS3.20ENCODE.2c.20biol_rep1.CNhs12325.10815.111B5.hg19	2.37317	0.00033
tpm.small.20cell.20lung.20carcinoma.20cell.20line.3aDMS.20144.CNhs12808.10841.111E4.hg19	2.37317	0.00033
tpm.extraskeletal.20myxoid.20chondrosarcoma.20cell.20line.3aH.EMC.SS.CNhs10728.10410.106B5.hg19	2.39036	0.00033
tpm.clear.20cell.20carcinoma.20cell.20line.3aJHOC.5.CNhs11745.10638.108I8.hg19	2.44733	0.0002
tpm.gall.20bladder.20carcinoma.20cell.20line.3aTGBC2TKB.CNhs10733.10415.106C1.hg19	2.44733	0.0002
tpm.epitheloid.20carcinoma.20cell.20line.3a.20HelaS3.20ENCODE.2c.20biol_rep3.CNhs12327.10817.111B7.hg19	2.51245	8e-05
tpm.cholangiocellular.20carcinoma.20cell.20line.3aHuH.28.CNhs11283.10536.107G5.hg19	2.53059	7e-05
tpm.endometrial.20stromal.20sarcoma.20cell.20line.3aOMC.9.CNhs11249.10448.106F7.hg19	2.53059	7e-05
tpm.fibrous.20histiocytoma.20cell.20line.3aGCT.20TIB.223.CNhs11842.10711.109H9.hg19	2.53059	7e-05
tpm.thyroid.20carcinoma.20cell.20line.3aTCO.1.CNhs11872.10783.110G9.hg19	2.56767	7e-05
tpm.testicular.20germ.20cell.20embryonal.20carcinoma.20cell.20line.3aNEC15.CNhs12362.10593.108D8.hg19	2.57711	7e-05
tpm.chronic.20myelogenous.20leukemia.20cell.20line.3aK562.20ENCODE.2c.20biol_rep3.CNhs12336.10826.111C7.hg19	2.61446	4e-05
tpm.acute.20myeloid.20leukemia.20.28FAB.20M6.29.20cell.20line.3aEEB.CNhs13059.10835.111D7.hg19	2.65291	4e-05
tpm.melanoma.20cell.20line.3aG.361.CNhs11254.10465.106H6.hg19	2.69894	2e-05
tpm.embryonic.20kidney.20cell.20line.3a.20HEK293.2fSLAM.20untreated.CNhs11046.10450.106F9.hg19	2.77981	1e-05
tpm.neuroectodermal.20tumor.20.20cell.20line.3aTASK1.CNhs11866.10774.110F9.hg19	2.81485	1e-05
tpm.chronic.20myelogenous.20leukemia.20cell.20line.3aK562.20ENCODE.2c.20biol_rep2.CNhs12335.10825.111C6.hg19	2.9561	0
tpm.epitheloid.20carcinoma.20cell.20line.3a.20HelaS3.20ENCODE.2c.20biol_rep2.CNhs12326.10816.111B6.hg19	3.04308	0
tpm.teratocarcinoma.20cell.20line.3aNCC.IT.A3.CNhs11878.10790.110H7.hg19	3.21899	0
tpm.choriocarcinoma.20cell.20line.3aT3M.3.CNhs11820.10618.108G6.hg19	3.30793	0
tpm.chronic.20myelogenous.20leukemia.20cell.20line.3aK562.20ENCODE.2c.20biol_rep1.CNhs12334.10824.111C5.hg19	3.32032	0
tpm.chondrosarcoma.20cell.20line.3aSW.201353.CNhs11833.10700.109G7.hg19	3.67043	0
tpm.colon.20carcinoma.20cell.20line.3aCOLO.320.CNhs10737.10420.106C6.hg19	3.67043	0
tpm.bronchioalveolar.20carcinoma.20cell.20line.3aNCI.H650.CNhs14138.10715.109I4.hg19	4.52763	0
