# Supplementary material for: The Constrained Maximal Expression Level Owing to Haploidy Shapes Gene Content on the Mammalian X Chromosome
Source: PLoS Biol. 2015 Dec 18;13(12):e1002315. doi: 10.1371/journal.pbio.1002315 (PMC4686125; doi:10.1371/journal.pbio.1002315)
Supplement: S7 Table — (XLSX) [file pbio.1002315.s017.xlsx]

## Sheet: S7 Table
S7 Table.
boe	refSeqs	expression-level(TPM)	tissue
0.726257	NM_018476	5604.08	medial_temporal_gyrus_adult_donor10258
0.117318	NM_003357	5608.37	lung_fetal_donor1
0.22905	NM_000424	5613.1	tongue_adult
1	NM_000146	5634.01	adipose_tissue
1	NM_000146	5643.44	spleen_fetal_pool1
0.988827	NM_001823	5643.8	occipital_pole_adult_pool1
0.469274	NM_001025081	5649.54	globus_pallidus_adult_donor10252
0.469274	NM_001025090	5649.54	globus_pallidus_adult_donor10252
0.469274	NM_001025092	5649.54	globus_pallidus_adult_donor10252
0.469274	NM_002385	5649.54	globus_pallidus_adult_donor10252
1	NM_001101	5653.59	small_intestine_adult_pool1
0.0391061	NM_000042	5655.48	SABiosciences_XpressRef_Human_Universal_Total_RNA
0.994413	NM_001540	5664.35	breast_adult_donor1
1	NM_005952	5668.31	skeletal_muscle_adult_pool1
0.620112	NM_006198	5668.92	thalamus_adult_donor10258
0.117318	NM_145252	5682.06	submaxillary_gland_adult
0.435754	NM_021066	5685.48	thymus_adult_pool1
1	NM_001101	5689.02	gall_bladder_adult
0.692737	NM_022121	5700.93	skin_adult_donor1
0.284916	NM_021175	5728.34	liver_adult_pool1
1	NM_000146	5747.96	breast_adult_donor1
1	NM_000146	5754.77	kidney_fetal_pool1
0.949721	NM_001647	5766.93	eye_muscle_superior_donor2
0.960894	NM_000954	5767.87	testis_adult_pool2
0.184358	NM_003279	5770.55	artery_adult
0.0726257	NM_001025200	5792.99	temporal_lobe_fetal_donor1_tech_rep2
0.994413	NM_001540	5800.31	Universal_RNA_Human_Normal_Tissues_Biochain
0.497207	NM_003064	5807.93	trachea_fetal_donor1
1	NM_000146	5810.25	small_intestine_fetal_donor1
1	NM_001101	5835.04	lung_adult_pool1
1	NM_001101	5844.66	colon_adult_pool1
0.497207	NM_001927	5854.96	left_ventricle_adult_donor1
0.469274	NM_001025081	5864.64	pons_adult_pool1
0.469274	NM_001025090	5864.64	pons_adult_pool1
0.469274	NM_001025092	5864.64	pons_adult_pool1
0.469274	NM_002385	5864.64	pons_adult_pool1
0.335196	NM_001100	5864.87	heart_adult_pool1
1	NM_001004	5872.79	skeletal_muscle_fetal_donor1
0.128492	NM_003122	5874.29	temporal_lobe_fetal_donor1_tech_rep2
0.960894	NM_000954	5877.83	occipital_pole_adult_pool1
0.977654	NM_001885	5878.29	medulla_oblongata_adult_pool1
0.994413	NM_001540	5880.7	SABiosciences_XpressRef_Human_Universal_Total_RNA
0.357542	NM_000371	5882.36	cerebral_meninges_adult
0.357542	NM_000371	5893.81	medulla_oblongata_adult_pool1
1	NM_001101	5924.69	thymus_fetal_pool1
0.122905	NM_003125	5937.58	tongue_adult
1	NM_001101	5940.15	vein_adult
1	NM_003118	5943.41	umbilical_cord_fetal_donor1
1	NM_003295	5954.44	thyroid_adult_pool1
0.0670391	NM_000735	5960.51	placenta_adult_pool1
0.497207	NM_001927	5962.09	heart_adult_diseased_post.infarction_donor1
0.955307	NM_000518	5992.11	lung_adult_pool1
0.290503	NM_003673	5999.51	heart_adult_diseased_donor1
0.47486	NM_005322	6000.26	thymus_adult_pool1
0.972067	NM_000064	6003.98	SABiosciences_XpressRef_Human_Universal_Total_RNA
1	NM_001101	6009.31	cervix_adult_pool1
0.145251	NM_001098538	6034.26	salivary_gland_adult_pool1
0.145251	NM_007244	6034.26	salivary_gland_adult_pool1
0.972067	NM_000064	6037.38	Universal_RNA_Human_Normal_Tissues_Biochain
1	NM_001101	6055.47	colon_adult_donor1
1	NM_003295	6086.33	ovary_adult_pool1
1	NM_003295	6089.85	vagina_adult
0.290503	NM_001824	6143.87	heart_adult_pool1
0.134078	NM_002274	6153.04	tonsil_adult_pool1
0.134078	NM_153490	6153.04	tonsil_adult_pool1
0.0223464	NM_019617	6162.82	stomach_fetal_donor1
0.592179	NM_002964	6231.01	tongue_adult
0.653631	NM_000088	6242.18	stomach_fetal_donor1
0.960894	NM_000954	6243.22	medulla_oblongata_adult_pool1
0.22905	NM_000424	6259.86	esophagus_adult_pool1
1	NM_001101	6264.7	appendix_adult
0.977654	NM_006432	6265.55	epididymis_adult
0.988827	NM_003407	6279.59	lung_fetal_donor1
0.994413	NM_001540	6289.8	aorta__adult_pool
0.73743	NM_000089	6291.17	trachea_fetal_donor1
0.117318	NM_000035	6318.43	SABiosciences_XpressRef_Human_Universal_Total_RNA
0.290503	NM_003673	6325.79	artery_adult
0.98324	NM_006009	6358.2	temporal_lobe_fetal_donor1_tech_rep1
0.0726257	NM_001025200	6360.36	duodenum_fetal_donor1_tech_rep1
1	NM_000146	6369.02	spleen_adult_pool1
0.910615	NM_006097	6386.12	smooth_muscle_adult_pool1
0.910615	NM_181526	6386.12	smooth_muscle_adult_pool1
0.027933	NM_000539	6398.81	eye_fetal_donor1
0.977654	NM_001885	6405.58	substantia_nigra_adult_donor10252
0.960894	NM_000954	6409.24	dura_mater_adult_donor1
0.0614525	NM_005988	6419.19	tongue_adult
0.664804	NM_080596	6421.65	thymus_adult_pool1
0.357542	NM_000371	6427.01	pineal_gland_adult_donor10252
0.357542	NM_000371	6457.38	pineal_gland_adult_donor10196
0.117318	NM_000035	6458.33	Universal_RNA_Human_Normal_Tissues_Biochain
0.977654	NM_001885	6468.99	spinal_cord_newborn_donor10223
0.189944	NM_013292	6481.49	tongue_fetal_donor1
0.0782123	NM_003225	6482.34	stomach_fetal_donor1
0.994413	NM_001540	6489.87	skeletal_muscle_adult_pool1
0.0670391	NM_006121	6503.52	skin_adult_donor1
0.469274	NM_001025081	6574.39	substantia_nigra_adult_donor10252
0.469274	NM_001025090	6574.39	substantia_nigra_adult_donor10252
0.469274	NM_001025092	6574.39	substantia_nigra_adult_donor10252
0.469274	NM_002385	6574.39	substantia_nigra_adult_donor10252
0.98324	NM_006009	6578.59	occipital_lobe_fetal_donor1
0.715084	NM_003514	6579.86	thymus_adult_pool1
1	NM_001101	6592.12	adipose_tissue
0.0782123	NM_054023	6694.35	lung_fetal_donor1
0.977654	NM_001885	6708.19	spinal_cord_adult_donor10252
0.0782123	NM_001110213	6711.33	salivary_gland_adult_pool1
0.0782123	NM_005042	6711.33	salivary_gland_adult_pool1
0.73743	NM_000089	6768.72	umbilical_cord_fetal_donor1
0.994413	NM_005348	6769.79	vagina_adult
0.223464	NM_003282	6777.68	tongue_adult
0.251397	NM_000257	6799.47	skeletal_muscle_adult_pool1
0.0391061	NM_000042	6877.27	liver_adult_pool1
0.145251	NM_001098538	6908.64	aorta__adult_pool
0.145251	NM_007244	6908.64	aorta__adult_pool
1	NM_004048	6916.17	lung_adult_pool1
0.357542	NM_000371	6938.4	liver_adult_pool1
0.0893855	NM_001097589	6981.87	tonsil_adult_pool1
0.0893855	NM_005416	6981.87	tonsil_adult_pool1
0.251397	NM_006063	6996.82	skeletal_muscle_adult_pool1
0.284916	NM_005205	7003.12	tongue_fetal_donor1
0.994413	NM_005321	7024.88	thymus_adult_pool1
0.0558659	NM_021010	7075.13	colon_adult_pool1
0.849162	NM_004102	7079.45	left_ventricle_adult_donor1
0.117318	NM_145252	7091.86	salivary_gland_adult_pool1
0.575419	NM_006744	7104.58	SABiosciences_XpressRef_Human_Universal_Total_RNA
0.860335	NM_001085	7132.52	liver_fetal_pool1
1	NM_000146	7132.92	lymph_node_adult_donor1
0.106145	NM_002272	7137.85	throat_adult
0.977654	NM_001885	7171.74	corpus_callosum_adult_pool1
0.251397	NM_000257	7175.07	heart_adult_diseased_post.infarction_donor1
0.469274	NM_001025081	7216.1	spinal_cord_adult_donor10252
0.469274	NM_001025090	7216.1	spinal_cord_adult_donor10252
0.469274	NM_001025092	7216.1	spinal_cord_adult_donor10252
0.469274	NM_002385	7216.1	spinal_cord_adult_donor10252
1	NM_006098	7223.73	skeletal_muscle_fetal_donor1
1	NM_001101	7230.46	uterus_adult_pool1
0.994413	NM_005319	7287.13	thymus_adult_pool1
0.340782	NM_000295	7293.64	small_intestine_fetal_donor1
0.145251	NM_005554	7295.72	tongue_adult
0.575419	NM_006744	7300.9	Universal_RNA_Human_Normal_Tissues_Biochain
0.027933	NM_007272	7305.41	temporal_lobe_fetal_donor1_tech_rep2
1	NM_001101	7323.3	aorta__adult_pool
0.960894	NM_000954	7336.13	corpus_callosum_adult_pool1
0.994413	NM_005953	7344.94	adrenal_gland
0.0223464	NM_005423	7412.63	stomach_fetal_donor1
0.0335196	NM_001215	7422.12	submaxillary_gland_adult
0.0335196	NM_080574	7425.95	submaxillary_gland_adult
0.659218	NM_000090	7438.74	trachea_fetal_donor1
1	NM_001101	7454.31	tonsil_adult_pool1
0.960894	NM_000954	7454.61	testis_adult_pool1
1	NM_004048	7459.34	blood_adult_pool
0.988827	NM_001553	7468.2	aorta__adult_pool
1	NM_003118	7484.85	skin_fetal_donor1
1	NM_001101	7496.9	prostate_adult_pool1
0.284916	NM_005205	7507.18	left_ventricle_adult_donor1
0.497207	NM_001927	7526.34	bladderadult_pool
0.592179	NM_003537	7594.71	thymus_adult_pool1
0.335196	NM_005159	7608.72	heart_adult_pool1
0.636872	NM_000239	7656.49	aorta__adult_pool
0.0502793	NM_003235	7669.37	throat_fetal_donor1
0.994413	NM_005953	7672.17	dura_mater_adult_donor1
0.111732	NM_001443	7693.85	colon_fetal_donor1
0.988827	NM_175617	7711.23	liver_fetal_pool1
0.497207	NM_001927	7720.2	heart_adult_diseased_donor1
0.027933	NM_170610	7779.16	testis_adult_pool2
1	NM_001004	7869.66	lymph_node_adult_donor1
0.284916	NM_005205	7879.44	heart_adult_diseased_donor1
0.659218	NM_000090	7897.43	uterus_fetal_donor1
0.0726257	NM_001868	7898.33	duodenum_fetal_donor1_tech_rep1
0.117318	NM_000035	7937.89	colon_adult_pool1
1	NM_001101	8046.12	lymph_node_adult_donor1
1	NM_001101	8099.25	ovary_adult_pool1
0.290503	NM_001824	8188.79	skeletal_muscle_fetal_donor1
0.290503	NM_001824	8223.62	throat_adult
0.977654	NM_001885	8224.66	substantia_nigra_newborn_donor10223
0.949721	NM_002084	8247.98	thyroid_adult_pool1
0.290503	NM_001824	8320.07	tongue_fetal_donor1
1	NM_001101	8320.89	esophagus_adult_pool1
0.698324	NM_000582	8357.76	kidney_adult_pool1
0.698324	NM_001040058	8357.76	kidney_adult_pool1
0.698324	NM_001040060	8357.76	kidney_adult_pool1
0.977654	NM_001885	8372.81	putamen_newborn_donor10223
0.290503	NM_001824	8375.01	cerebrospinal_fluid_donor2
0.027933	NM_170610	8393.24	testis_adult_pool1
0.977654	NM_001885	8402.88	kidney_adult_pool1
1	NM_000146	8475.3	lung_adult_pool1
0.290503	NM_001824	8502.6	tongue_adult
0.312849	NM_003280	8538.12	heart_adult_pool1
0.0558659	NM_021010	8553.29	small_intestine_adult_pool1
0.653631	NM_000088	8567.08	rectum_fetal_donor1
0.106145	NM_002272	8599.43	tonsil_adult_pool1
0.497207	NM_001927	8602.99	smooth_muscle_adult_pool1
0.139665	NM_002652	8613.79	submaxillary_gland_adult
1	NM_001101	8684.66	spleen_adult_pool1
0.469274	NM_001025081	8759.06	medulla_oblongata_adult_pool1
0.469274	NM_001025090	8759.06	medulla_oblongata_adult_pool1
0.469274	NM_001025092	8759.06	medulla_oblongata_adult_pool1
0.469274	NM_002385	8759.06	medulla_oblongata_adult_pool1
0.575419	NM_006744	8880.6	liver_adult_pool1
0.0223464	NM_001900	8931.88	salivary_gland_adult_pool1
0.653631	NM_000088	9018.89	spinal_cord_fetal_donor1
0.843575	NM_000612	9037.88	tongue_fetal_donor1
0.0558659	NM_000482	9052.26	small_intestine_adult_pool1
0.312849	NM_003280	9054.42	skeletal_muscle_adult_pool1
0.0893855	NM_001097589	9136.36	esophagus_adult_pool1
0.0893855	NM_005416	9136.36	esophagus_adult_pool1
1	NM_001101	9183.78	spleen_fetal_pool1
0.73743	NM_000089	9192.1	skin_fetal_donor1
0.938547	NM_002612	9292.19	skeletal_muscle_adult_pool1
0.128492	NM_003122	9309.1	duodenum_fetal_donor1_tech_rep1
0.977654	NM_001885	9367.67	heart_adult_pool1
0.497207	NM_001927	9380.74	skeletal_muscle_adult_pool1
0.189944	NM_052863	9412.34	trachea_fetal_donor1
1	NM_004048	9428.15	spleen_adult_pool1
0.223464	NM_003282	9459.36	diaphragm_fetal_donor1
1	NM_001101	9478.2	smooth_muscle_adult_pool1
0.659218	NM_000090	9487.29	umbilical_cord_fetal_donor1
0.251397	NM_000257	9529.49	heart_fetal_pool1
0.357542	NM_000371	9539.59	Universal_RNA_Human_Normal_Tissues_Biochain
0.977654	NM_001885	9555.95	skeletal_muscle_adult_pool1
0.938547	NM_002612	9616.01	left_ventricle_adult_donor1
0.977654	NM_001885	9626.2	heart_adult_diseased_post.infarction_donor1
0.357542	NM_000371	9670.29	SABiosciences_XpressRef_Human_Universal_Total_RNA
1	NM_001101	9675.88	dura_mater_adult_donor1
0.027933	NM_007272	9700.44	duodenum_fetal_donor1_tech_rep1
0.972067	NM_000064	9714.36	liver_fetal_pool1
0.0391061	NM_001906	9770.7	temporal_lobe_fetal_donor1_tech_rep2
0.743017	NM_005950	9817.52	colon_fetal_donor1
0.0223464	NM_053283	9822.16	skin_adult_donor1
0.843575	NM_000612	9826.23	liver_fetal_pool1
0.027933	NM_007272	9840.4	pancreas_adult_donor1
0.0335196	NM_080574	9856.75	salivary_gland_adult_pool1
0.0391061	NM_001906	9956.62	duodenum_fetal_donor1_tech_rep1
1	NM_003295	9999.39	skeletal_muscle_adult_pool1
0.98324	NM_006009	10015	duodenum_fetal_donor1_tech_rep2
0.0726257	NM_001868	10028.1	temporal_lobe_fetal_donor1_tech_rep2
0.960894	NM_000954	10062.3	cerebral_meninges_adult
0.0223464	NM_001900	10157.6	parotid_gland_adult
0.0446927	NM_001869	10242.7	pancreas_adult_donor1
0.994413	NM_005953	10255.5	liver_adult_pool1
0.139665	NM_002652	10255.9	seminal_vesicle_adult
0.189944	NM_013292	10307.7	skeletal_muscle_fetal_donor1
0.100559	NM_005557	10459.8	Fingernail
1	NM_001101	10460.9	thymus_adult_pool1
0.027933	NM_005747	10573.2	pancreas_adult_donor1
0.977654	NM_001885	10604.2	skeletal_muscle_soleus_muscle_donor1
0.0335196	NM_002762	10622.4	testis_adult_pool2
0.949721	NM_002084	10656.1	kidney_adult_pool1
0.0614525	NM_001145007	10663.3	salivary_gland_adult_pool1
0.0614525	NM_152291	10663.3	salivary_gland_adult_pool1
0.290503	NM_001824	10688.6	skeletal_muscle_soleus_muscle_donor1
0.0335196	NM_002762	10710	testis_adult_pool1
0.335196	NM_001100	10759.9	skeletal_muscle_soleus_muscle_donor1
0.98324	NM_006009	10765	brain_fetal_pool1
0.027933	NM_000394	10790.7	eye_fetal_donor1
0.972067	NM_000064	10799.5	liver_adult_pool1
1	NM_001101	10827	bladderadult_pool
0.486034	NM_001442	10831	adipose_tissue
0.0670391	NM_000735	10870.6	pituitary_gland_adult_donor10196
0.430168	NM_001803	10905.8	epididymis_adult
0.977654	NM_001885	10985.8	left_ventricle_adult_donor1
0.106145	NM_002272	11030.4	esophagus_adult_pool1
0.994413	NM_001540	11032.6	esophagus_adult_pool1
0.497207	NM_001927	11061.7	heart_adult_pool1
0.653631	NM_000088	11210.8	skin_adult_donor1
0.994413	NM_005346	11243.1	vagina_adult
0.765363	NM_000029	11285.7	liver_fetal_pool1
0.0446927	NM_001622	11326	liver_fetal_pool1
0.0614525	NM_001145007	11441.9	submaxillary_gland_adult
0.0614525	NM_152291	11442.2	submaxillary_gland_adult
0.223464	NM_003282	11469.7	artery_adult
0.0502793	NM_001080468	11574.8	pancreas_adult_donor1
0.0223464	NM_002761	11590.9	testis_adult_pool2
0.977654	NM_001885	11663.9	heart_fetal_pool1
0.636872	NM_000239	11988.1	trachea_fetal_donor1
0.335196	NM_005159	12065.7	heart_fetal_pool1
0.486034	NM_001442	12195.6	breast_adult_donor1
0.843575	NM_000612	12263.3	skeletal_muscle_fetal_donor1
0.0167598	NM_000567	12281.3	liver_adult_pool1
0.653631	NM_000088	12478.6	eye_fetal_donor1
0.653631	NM_000088	12567.2	throat_fetal_donor1
0.469274	NM_001025081	12574.1	corpus_callosum_adult_pool1
0.469274	NM_001025090	12574.1	corpus_callosum_adult_pool1
0.469274	NM_001025092	12574.1	corpus_callosum_adult_pool1
0.469274	NM_002385	12574.1	corpus_callosum_adult_pool1
0.0726257	NM_002909	12603.6	pancreas_adult_donor1
0.117318	NM_000421	12663.1	skin_adult_donor1
0.290503	NM_001824	12829.9	diaphragm_fetal_donor1
0.497207	NM_003064	12868.5	trachea_adult_pool1
0.335196	NM_001100	12956.7	penis_adult
0.134078	NM_002274	13082.2	esophagus_adult_pool1
0.134078	NM_153490	13082.2	esophagus_adult_pool1
0.994413	NM_000100	13113	esophagus_adult_pool1
0.0223464	NM_002761	13207.1	testis_adult_pool1
0.251397	NM_000257	13244.6	heart_adult_pool1
0.977654	NM_001885	13395.5	heart_adult_diseased_donor1
0.251397	NM_000257	13405.9	left_ventricle_adult_donor1
0.139665	NM_002652	13518.1	salivary_gland_adult_pool1
0.335196	NM_001100	13633.3	cerebrospinal_fluid_donor2
0.251397	NM_000257	13728.8	heart_adult_diseased_donor1
0.027933	NM_007352	13916	pancreas_adult_donor1
0.290503	NM_001824	14080.7	artery_adult
0.357542	NM_000371	14121.8	corpus_callosum_adult_pool1
1	NM_000146	14438.8	liver_fetal_pool1
0.653631	NM_000088	14592.8	uterus_fetal_donor1
0.195531	NM_006528	14629.7	placenta_adult_pool1
0.960894	NM_000954	14635.1	retina_adult_pool1
0.223464	NM_003282	14960.7	skeletal_muscle_fetal_donor1
0.653631	NM_000088	14966	skeletal_muscle_fetal_donor1
0.145251	NM_001098538	15084.6	throat_adult
0.145251	NM_007244	15084.6	throat_adult
0.357542	NM_000371	15118.6	retina_adult_pool1
0.128492	NM_003122	15320.4	pancreas_adult_donor1
0.0558659	NM_006250	15336.8	salivary_gland_adult_pool1
0.994413	NM_005953	15435.1	liver_fetal_pool1
0.636872	NM_000239	15452.9	throat_adult
0.106145	NM_000040	15494.8	liver_fetal_pool1
0.653631	NM_000088	15550.6	trachea_fetal_donor1
0.653631	NM_000088	16011.9	umbilical_cord_fetal_donor1
0.653631	NM_000088	16103.9	diaphragm_fetal_donor1
0.0335196	NM_001215	16108.7	parotid_gland_adult
0.0502793	NM_001184741	16222.4	liver_adult_pool1
0.0502793	NM_005141	16222.4	liver_adult_pool1
0.117318	NM_000035	16363.1	small_intestine_adult_pool1
0.0446927	NM_001322	16457	salivary_gland_adult_pool1
0.659218	NM_000090	16937.2	skin_fetal_donor1
0.0502793	NM_003235	17010.7	thyroid_fetal_donor1
0.0782123	NM_001110213	17323	submaxillary_gland_adult
0.0782123	NM_005042	17323	submaxillary_gland_adult
0.0558659	NM_006250	17402.9	submaxillary_gland_adult
0.994413	NM_001540	18427.2	vagina_adult
0.335196	NM_001100	18930.2	tongue_adult
1	NM_005345	19049.3	vagina_adult
0.0335196	NM_002159	19266.2	submaxillary_gland_adult
0.0391061	NM_001906	19369.9	pancreas_adult_donor1
0.0558659	NM_000508	19597.3	liver_adult_pool1
0.0558659	NM_021871	19597.3	liver_adult_pool1
0.335196	NM_001100	19914.9	skeletal_muscle_fetal_donor1
0.860335	NM_001085	19980.2	liver_adult_pool1
0.223464	NM_003282	20649.7	tongue_fetal_donor1
0.0558659	NM_000102	20809.9	adrenal_gland
0.027933	NM_003008	21241.3	seminal_vesicle_adult
0.0502793	NM_003235	22863.3	thyroid_adult_pool1
0.0837989	NM_001832	22917.6	duodenum_fetal_donor1_tech_rep1
0.340782	NM_000295	23793.4	SABiosciences_XpressRef_Human_Universal_Total_RNA
0.340782	NM_000295	23853.4	Universal_RNA_Human_Normal_Tissues_Biochain
0.653631	NM_000088	24114.6	skin_fetal_donor1
0.0558659	NM_000509	24249.2	liver_adult_pool1
0.0558659	NM_021870	24249.2	liver_adult_pool1
0.335196	NM_001100	24597.6	tongue_fetal_donor1
0.0335196	NM_002159	24816.8	salivary_gland_adult_pool1
0.335196	NM_001100	24845.7	diaphragm_fetal_donor1
0.0335196	NM_002159	25146.6	parotid_gland_adult
0.0837989	NM_001832	25757.7	temporal_lobe_fetal_donor1_tech_rep2
0.357542	NM_000371	25834.5	medulla_oblongata_adult_donor10252
0.0335196	NM_000200	25866.1	salivary_gland_adult_pool1
0.290503	NM_001824	25881.9	skeletal_muscle_adult_pool1
0.335196	NM_001100	26792.2	throat_adult
0.743017	NM_005950	27700	liver_fetal_pool1
0.636872	NM_000239	29206.7	trachea_adult_pool1
0.0782123	NM_001110213	31692.8	parotid_gland_adult
0.0782123	NM_005042	31692.8	parotid_gland_adult
0.027933	NM_003008	32519.1	ductus_deferens_adult
0.0391061	NM_033440	33645.9	pancreas_adult_donor1
0.0502793	NM_000936	35235.9	pancreas_adult_donor1
0.0670391	NM_000928	35795.2	pancreas_adult_donor1
0.0335196	NM_000200	38148.9	submaxillary_gland_adult
0.0837989	NM_006685	38292.5	parotid_gland_adult
0.145251	NM_001098538	40231.5	trachea_adult_pool1
0.145251	NM_007244	40231.5	trachea_adult_pool1
0.0614525	NM_006172	40760.6	left_atrium_adult_donor1
0.167598	NM_000477	43873.5	liver_fetal_pool1
0.357542	NM_000371	44862	medulla_oblongata_adult_donor10196
0.0558659	NM_006249	47975.3	parotid_gland_adult
0.0558659	NM_006250	57348.8	parotid_gland_adult
0.335196	NM_001100	58070.1	skeletal_muscle_adult_pool1
0.0614525	NM_002769	61176.9	pancreas_adult_donor1
0.335196	NM_001100	63442.3	artery_adult
0.0949721	NM_001009181	67021.2	parotid_gland_adult
0.0949721	NM_003154	67021.2	parotid_gland_adult
0.0726257	NM_001868	68343.6	pancreas_adult_donor1
0.0670391	NM_001871	70360.8	pancreas_adult_donor1
0.027933	NM_003007	70653.1	seminal_vesicle_adult
0.027933	NM_000948	72523.8	pituitary_gland_adult_donor10252
0.167598	NM_000477	76427	SABiosciences_XpressRef_Human_Universal_Total_RNA
0.167598	NM_000477	77945.5	Universal_RNA_Human_Normal_Tissues_Biochain
0.167598	NM_000477	78347.1	liver_adult_pool1
0.0949721	NM_001009181	80362.5	submaxillary_gland_adult
0.0949721	NM_003154	80362.5	submaxillary_gland_adult
0.027933	NM_000948	82030.2	pituitary_gland_adult_donor10196
0.0726257	NM_001025200	89742.1	pancreas_adult_donor1
0.340782	NM_000295	95007.2	liver_adult_pool1
0.0837989	NM_001832	112774	pancreas_adult_donor1
0.027933	NM_003007	112860	ductus_deferens_adult
0.0335196	NM_000200	126071	parotid_gland_adult
0.340782	NM_000295	127057	liver_fetal_pool1
0.0949721	NM_001009181	130889	salivary_gland_adult_pool1
0.0949721	NM_003154	130889	salivary_gland_adult_pool1
0.0502793	NM_002723	136988	parotid_gland_adult
0.0837989	NM_006685	209252	submaxillary_gland_adult
0.0837989	NM_006685	295980	salivary_gland_adult_pool1
0.955307	NM_000518	348120	blood_adult_pool
