# Supplementary material for: The Constrained Maximal Expression Level Owing to Haploidy Shapes Gene Content on the Mammalian X Chromosome
Source: PLoS Biol. 2015 Dec 18;13(12):e1002315. doi: 10.1371/journal.pbio.1002315 (PMC4686125; doi:10.1371/journal.pbio.1002315)
Supplement: S13 Table — (XLSX) [file pbio.1002315.s023.xlsx]

## Sheet: S13 Table
S13 Table.
Chromosome	Cutoff	Window size	Mean	Median	1stQ	3rdQ	Max	Exactly-1 TF	Exactly-2 TF	Up-to-5
										TFs
Autosomes	All sites	250	26.36	24	8	41	109	5.87	4.36	19.47
X	All sites	250	16.29	13	5	25	84	9.66	7.47	27.62
Autosomes	All sites	500	31.11	29	10	48	126	5.29	3.79	17.2
X	All sites	500	19.29	16	6	30	84	8.73	4.81	24.51
Autosomes	All sites	1000	36.57	34	12	56	162	4.48	3.06	14.8
X	All sites	1000	21.96	18	6	33	102	7.42	5.55	23.46
Autosomes	All sites	5000	52.87	49	21	76	368	1.72	1.46	7.79
X	All sites	5000	28.19	21	7	41	157	5.42	3.61	19.73
Autosomes	All sites	10000	70.35	63	31	97	515	0.78	0.66	4.03
X	All sites	10000	35.45	29	10	50	196	3.38	2.72	13.22
Autosomes	Cutoff of 500	250	10.11	9	3	15	56	11.81	7.83	36.49
X	Cutoff of 500	250	5.681	4	2	7	39	18.77	8.94	64.86
Autosomes	Cutoff of 500	500	11.13	10	4	17	58	10.39	7.9	33.67
X	Cutoff of 500	500	6.297	5	3	8	39	15.46	8.33	58.57
Autosomes	Cutoff of 500	1000	12.2	10	4	18	71	8.9	6.99	30.99
X	Cutoff of 500	1000	6.822	5	3	9	40	14.4	7.2	54.82
Autosomes	Cutoff of 500	5000	15.85	13	6	22	105	5.69	4.87	22.82
X	Cutoff of 500	5000	8.072	6	3	11	43	15.96	5.58	47.7
Autosomes	Cutoff of 500	10000	20.24	17	8	28	154	3.79	3.27	16.88
X	Cutoff of 500	10000	9.474	7	3	14	47	14.44	5.61	39.93
